# Supplementary material for: Lab-in-a-fiber-based integrated particle separation and counting
Source: Royal Society of Chemistry journal article supplement (doi:10.1039/d2lc01175a), 2023-01-01
Supplement: d2lc01175a1.pdf [file d2lc01175a1.pdf]

## Supplementary Material (ESI) for Lab on a Chip

Electronic Supplementary Information (ESI)

### Lab-in-a-fiber based integrated particle separation and counting

*T. Kumar<sup>\*,a,d</sup>, A.V. Harish<sup>\*,b</sup>, S. Etcheverry<sup>c</sup>, W. Margulis<sup>c</sup>, F. Laurell<sup>b</sup>, A. Russom<sup>a,d+</sup>*

<sup>a</sup> *Division of Nanobiotechnology, Department of Protein Science, Science for life laboratory, KTH Royal Institute of Technology, Solna, Sweden.*

<sup>b</sup> *Laser Physics, Department of Applied Physics, KTH Royal Institute of Technology, Stockholm, Sweden.*

<sup>c</sup> *Research Institutes of Sweden (RISE), Stockholm, Sweden.*

<sup>d</sup> *AIMES - Center for the Advancement of Integrated Medical and Engineering Sciences at Karolinska Institutet and KTH Royal Institute of Technology, Stockholm, Sweden*

<sup>+</sup> *Corresponding author: [aman@kth.se](mailto:aman@kth.se)*

*\*Authors contributed equally*

## 1. Fabrication of the fiber components

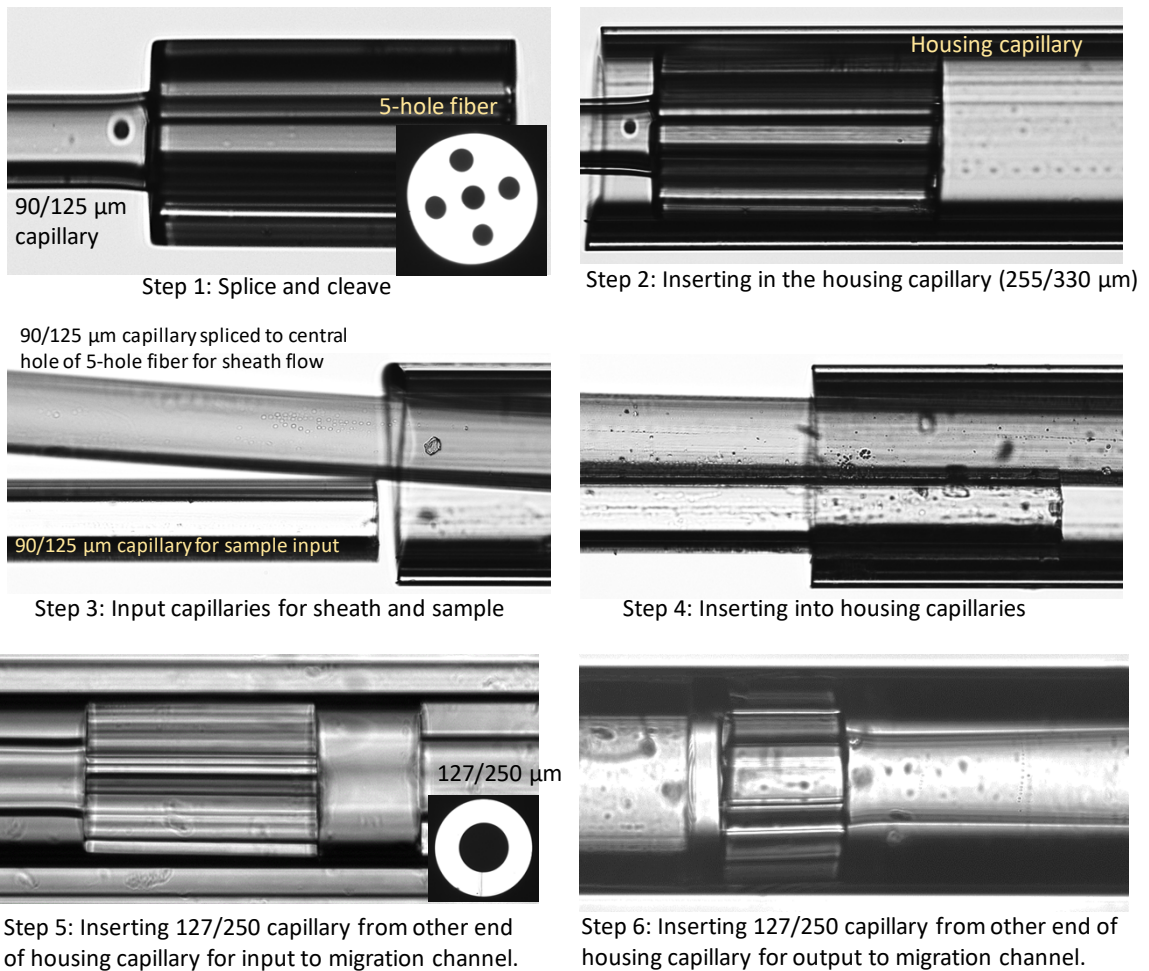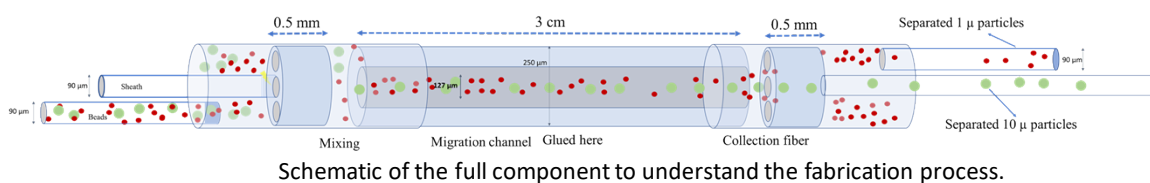

**Fig. S1.: Separation component fabrication.** Images of the step-by-step process of fabrication of the separation component are shown in this figure. Step 1: First we splice a 90/125 capillary to the central hole of the 5-hole fiber (a cross-section of the 5-hole fiber is shown in the inset). The spliced fiber is then cleaved such that the length of the 5-hole fiber is 0.5 mm. Step 2: We insert the whole assembly into a housing capillary (255/330  $\mu\text{m}$ ). Steps 3 and 4: We then insert another 90/125  $\mu\text{m}$  capillary into the housing capillary to flow the sample. The capillary is pushed into the housing capillary and the assembly is glued with UV-curing glue. Step 5: From the distal end of the housing capillary, we insert the 127/250  $\mu\text{m}$  capillary (cross-section picture shown in the inset) where the separation of migrating particles takes place. Step 6: A similar module fabricated as before in reverse order is built for the output of separated particles. The

remaining end of the 127/250  $\mu\text{m}$  capillary is inserted into the housing capillary, concluding the full component as shown in the schematic.

## 2. Particle migration in circular microchannels

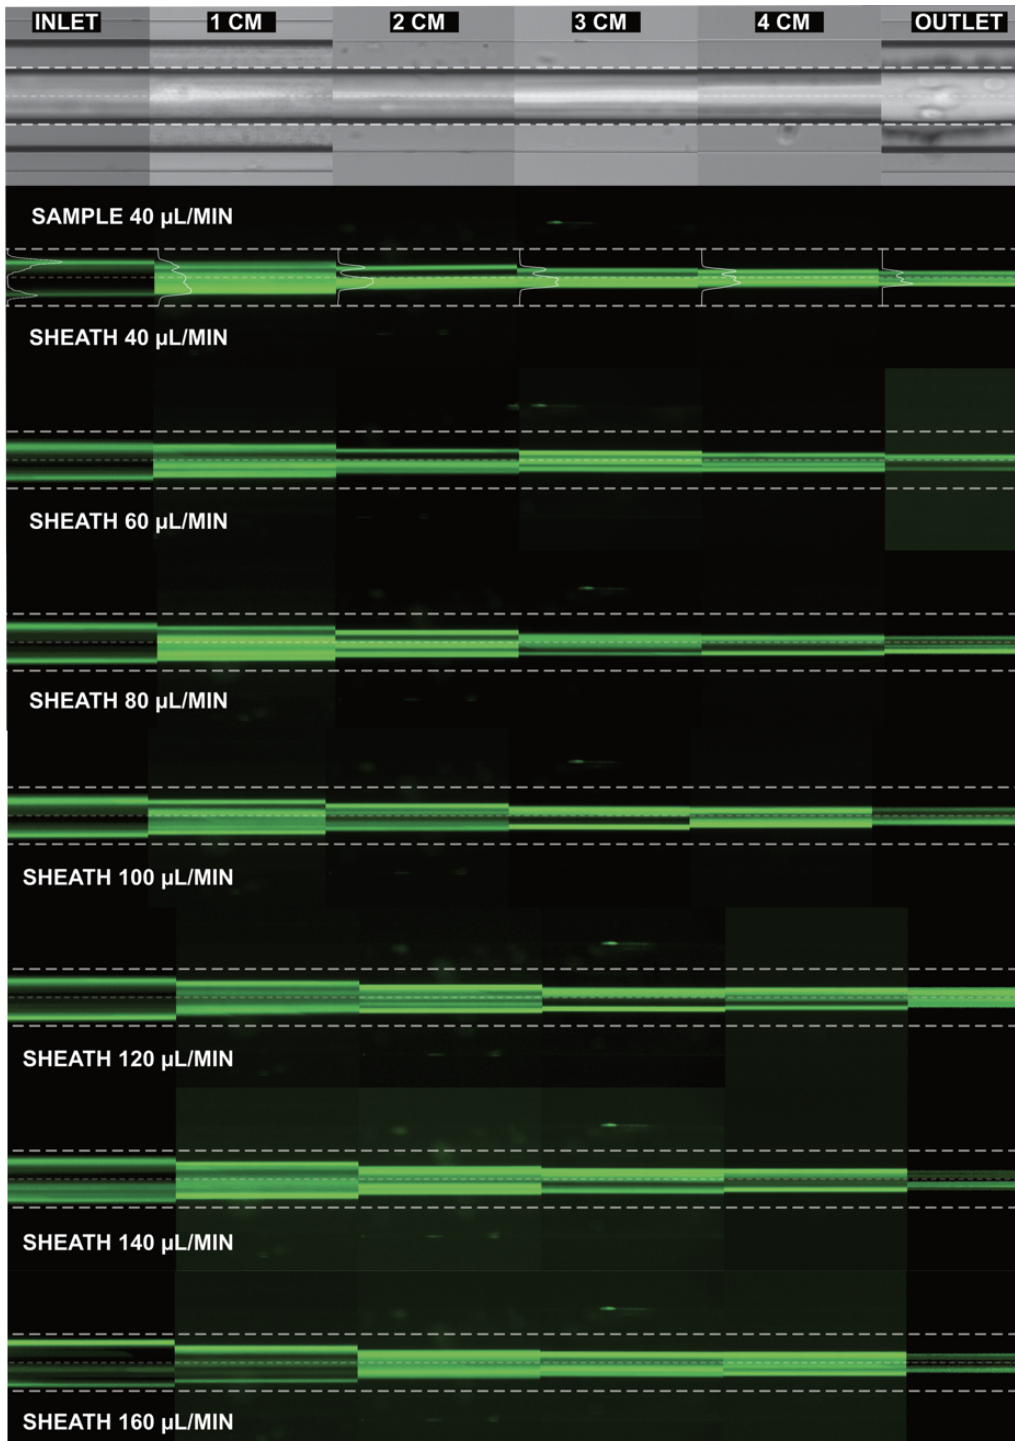

**Fig. S2 A: Particle elasto-inertial migration.** Fluorescent images of the separation capillary (127/250  $\mu\text{m}$  capillary) at locations 0 to 5 cm showing the streamlines of the 10  $\mu\text{m}$  particles. The particles migrate toward the center irrespective of sheath flow rates (ranging from 40-160  $\mu\text{L}/\text{min}$ ) at a fixed sample flow rate of 40  $\mu\text{L}/\text{min}$ .

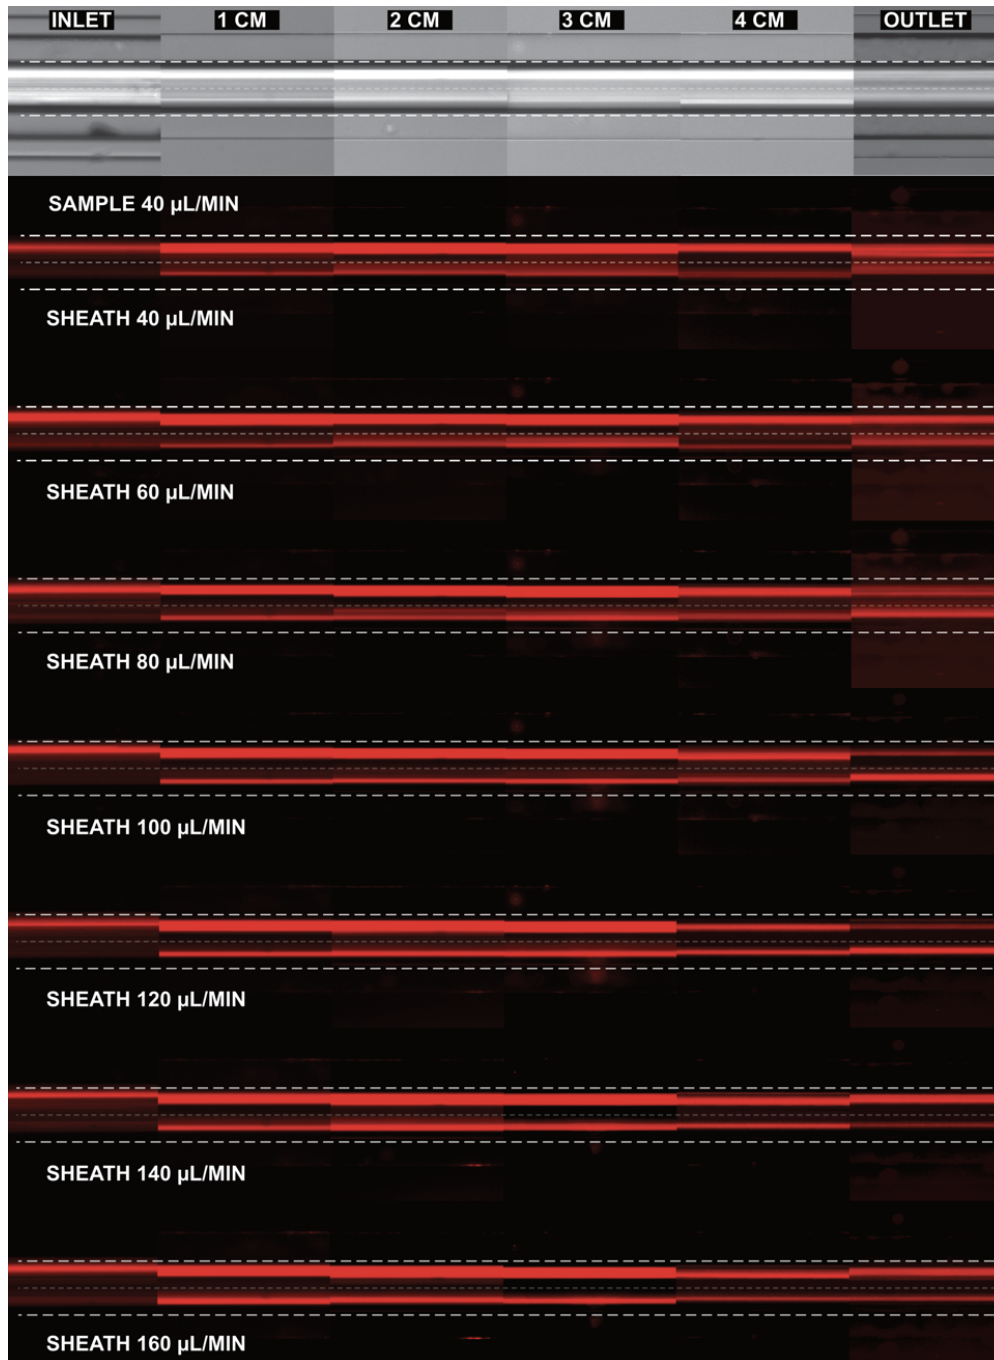

**Fig. S2 B:** Fluorescent images of the separation capillary at locations 0 to 5 cm showing the streamlines of the 1  $\mu\text{m}$  particles. Contrary to the larger particles, the smaller 1  $\mu\text{m}$  particles

remain close to the wall and do not migrate to the center irrespective of the sheath flow rates (40-160 $\mu\text{L}/\text{min}$ ) for the sheath and fixed 40  $\mu\text{L}/\text{min}$  for the sample.

### 3. Separation and integrated counting

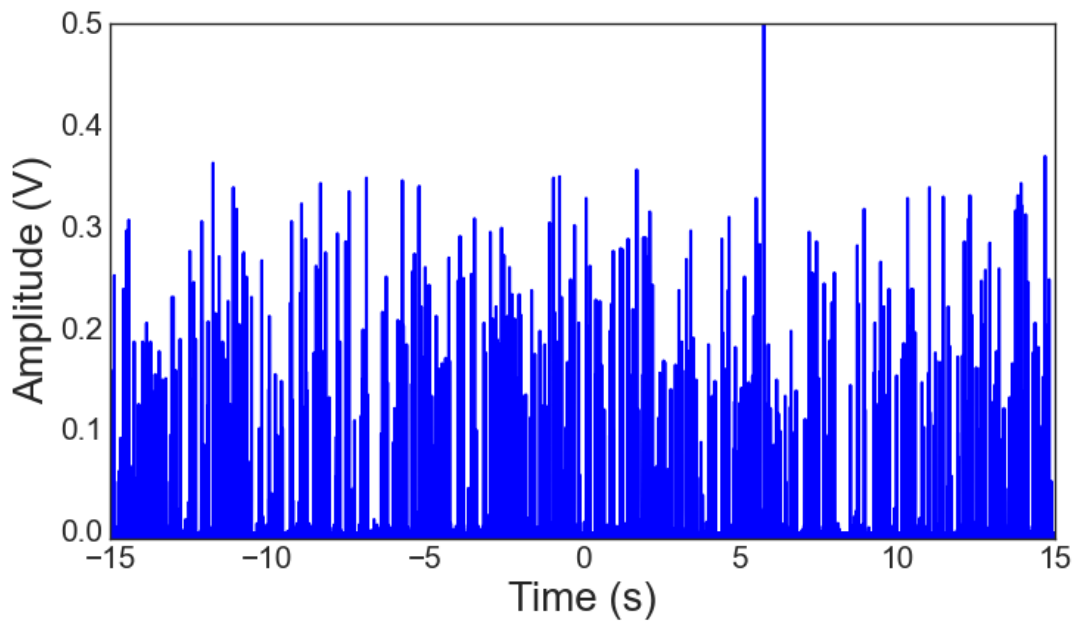

**Fig. S3: Particle counting.** Temporal trace showing the particle counting of separated 10  $\mu\text{m}$  green fluorescent particles using the “all-fiber” cytometer that was integrated with the separation component. The variation in the amplitude measured is high due to weak particles focusing at a total flow rate of 50  $\mu\text{L}/\text{min}$  (sample flow rate of 10  $\mu\text{L}/\text{min}$  + sheath flow rate of 40  $\mu\text{L}/\text{min}$ ).
